# Supplementary material for: Clinical and laboratorial outcome of different age-onset systemic lupus erythematosus patients in Jiangsu, China: a multicentre retrospective study
Source: PubMed Central journal article supplement (PMC9226048; doi:10.1038/s41598-022-14840-4), 2022-06-23
Supplement: 41598_2022_14840_MOESM1_ESM.pdf [file 41598_2022_14840_MOESM1_ESM.pdf]

**Clinical and laboratorial outcome of different age-onset systemic lupus erythematosus patients in Jiangsu, China - a multicentre retrospective study**

Lihui Wen<sup>1</sup>, Ziyang Chen<sup>1</sup>, Ziyi Jin<sup>1</sup>, Wenyong Pan<sup>2</sup>, Lin Liu<sup>3</sup>, Min Wu<sup>4</sup>, Fuwan Ding<sup>5</sup>, Huaixia Hu<sup>6</sup>, Xiang Ding<sup>7</sup>, Hua Wei<sup>8</sup>, Yaohong Zou<sup>9</sup>, Xian Qian<sup>10</sup>, Meimei Wang<sup>11</sup>, Jian Wu<sup>12</sup>, Juan Tao<sup>13</sup>, Jun Tan<sup>14</sup>, Zhanyun Da<sup>15</sup>, Miaoja Zhang<sup>16</sup>, Jing Li<sup>17</sup>, Xuebing Feng<sup>1</sup>, Jun Liang<sup>\*1</sup>, Huayong Zhang<sup>\*1</sup>, Lingyun Sun<sup>1</sup>

1. Department of Rheumatology and Immunology, Nanjing University Medical School Affiliated Nanjing Drum Tower Hospital, Nanjing, China
2. Department of Rheumatology, Huai'an First People's Hospital, Huai'an, China
3. Department of Rheumatology, Xuzhou Central Hospital, Xuzhou, China
4. Department of Rheumatology, Third Affiliated Hospital of Soochow University, Changzhou, China
5. Department of Endocrinology, Yancheng Third People's Hospital, Yancheng, China
6. Department of Rheumatology, Lianyungang Second People's Hospital, Lianyungang, China
7. Department of Rheumatology, Lianyungang First People's Hospital, Lianyungang, China
8. Department of Rheumatology, Northern Jiangsu People's Hospital, Yangzhou, China
9. Department of Rheumatology, Wuxi People's Hospital, Wuxi, China
10. Department of Rheumatology, Jiangsu Province Hospital of Traditional Chinese Medicine, Nanjing, China
11. Department of Rheumatology, Southeast University Zhongda Hospital, Nanjing, China
12. Department of Rheumatology, First Affiliated Hospital of Soochow

University, Suzhou, China

13. Department of Rheumatology, Wuxi Hospital of Traditional Chinese Medicine, Wuxi, China

14. Department of Rheumatology, Zhenjiang First People's Hospital, Zhenjiang, China

15. Department of Rheumatology, Affiliated Hospital of Nantong University, Nantong, China

16. Department of Rheumatology, Jiangsu Province Hospital and Nanjing Medical University First Affiliated Hospital, Nanjing, China

17. Department of Rheumatology, Affiliated Hospital of Jiangsu University, Zhenjiang, China

Correspondence to:

Huayong Zhang. Department of Rheumatology and Immunology, Affiliated Nanjing Drum Tower Hospital, Medical School of Nanjing University, 321 Zhongshan Road, Nanjing 210008, China. Email: huayong.zhang@nju.edu.cn.

Jun Liang. Department of Rheumatology and Immunology, Affiliated Nanjing Drum Tower Hospital, Medical School of Nanjing University, 321 Zhongshan Road, Nanjing 210008, China. Email: 13505193169@139.com.

Lihui Wen and Ziyang Chen contributed equally to this work.

Supplementary Table 1. Detailed organ damages on admission among different age-onset groups

| <b><i>Organ damage on admission</i></b>               | <b>All<br/>(n=797)</b> | <b>JSLE<sup>a</sup><br/>(n=88)</b> | <b>ASLE<sup>b</sup><br/>(n=638)</b> | <b>LSLE<sup>c</sup><br/>(n=71)</b> | <b>P</b> |
|-------------------------------------------------------|------------------------|------------------------------------|-------------------------------------|------------------------------------|----------|
| <b><i>Ocular</i></b>                                  | 2 (0.3)                | 1 (1.1)                            | 1 (0.2)                             | 0 (0.0)                            | 0.359    |
| Any cataract ever                                     | 1 (0.1)                | 1 (1.1)                            | 0 (0.0)                             | 0 (0.0)                            | 0.199    |
| Retinal change or optic atrophy                       | 1 (0.1)                | 0 (0.0)                            | 1 (0.2)                             | 0 (0.0)                            | 1.000    |
| <b><i>Neuropsychiatric</i></b>                        | 18 (2.3)               | 1 (1.1)                            | 15 (2.4)                            | 2 (2.8)                            | 0.823    |
| Cognitive impairment                                  | 12 (1.5)               | 0 (0.0)                            | 12 (1.9)                            | 0 (0.0)                            | 0.242    |
| Seizures requiring therapy for 6 months               | 3 (0.4)                | 1 (1.1)                            | 2 (0.3)                             | 0 (0.0)                            | 0.488    |
| Cerebrovascular accident ever                         | 4 (0.5)                | 0 (0.0)                            | 2 (0.3)                             | 2 (2.8)                            | 0.047    |
| Cranial or peripheral neuropathy                      | 1 (0.1)                | 0 (0.0)                            | 0 (0.0)                             | 1 (1.4)                            | 0.089    |
| <b><i>Renal</i></b>                                   | 85 (10.7)              | 11 (12.5)                          | 65 (10.2)                           | 9 (12.7)                           | 0.703    |
| Estimated or measured glomerular filtration rate <50% | 20 (2.5)               | 3 (3.4)                            | 16 (2.5)                            | 1 (1.4)                            | 0.772    |
| Proteinuria $\geq$ 3.5 gm/24 hours                    | 67 (8.4)               | 9 (10.2)                           | 52 (8.2)                            | 6 (8.5)                            | 0.805    |
| End-stage renal disease                               | 22 (2.8)               | 6 (6.8)                            | 12 (1.9)                            | 4 (5.6)                            | 0.016    |
| <b><i>Pulmonary</i></b>                               | 19 (2.4)               | 0 (0.0)                            | 15 (2.4)                            | 4 (5.6)                            | 0.060    |
| Pulmonary fibrosis                                    | 12 (1.5)               | 0 (0.0)                            | 10 (1.6)                            | 2 (2.8)                            | 0.338    |
| Shrinking lung                                        | 7 (0.9)                | 0 (0.0)                            | 4 (0.6)                             | 3 (4.2)                            | 0.023    |
| Pulmonary infarction                                  | 2 (0.3)                | 0 (0.0)                            | 2 (0.3)                             | 0 (0.0)                            | 1.000    |
| <b><i>Cardiovascular</i></b>                          | 16 (2.0)               | 0 (0.0)                            | 16 (2.5)                            | 0 (0.0)                            | 0.161    |

|                                                                                 |            |           |           |           |       |
|---------------------------------------------------------------------------------|------------|-----------|-----------|-----------|-------|
| Valvular disease                                                                | 2 (0.3)    | 0 (0.0)   | 2 (0.3)   | 0 (0.0)   | 1.000 |
| Pericarditis for 6 months/pericardiectomy                                       | 14 (1.8)   | 0 (0.0)   | 14 (2.2)  | 0 (0.0)   | 0.162 |
| <b><i>Peripheral vascular</i></b>                                               | 3 (0.4)    | 0 (0.0)   | 2 (0.3)   | 1 (1.4)   | 0.275 |
| Minor tissue loss (pulp space)                                                  | 1 (0.1)    | 0 (0.0)   | 1 (0.2)   | 0 (0.0)   | 1.000 |
| Venous thrombosis with swelling/ulceration/venous stasis                        | 2 (0.3)    | 0 (0.0)   | 1 (0.2)   | 1 (1.4)   | 0.182 |
| <b><i>Gastrointestinal</i></b>                                                  | 3 (0.4)    | 0 (0.0)   | 3 (0.5)   | 0 (0.0)   | 1.000 |
| Infarction or resection of bowel below duodenum, spleen, liver, or gall bladder | 2 (0.3)    | 0 (0.0)   | 2 (0.3)   | 0 (0.0)   | 1.000 |
| Mesenteric insufficiency                                                        | 1 (0.1)    | 0 (0.0)   | 1 (0.2)   | 0 (0.0)   | 1.000 |
| <b><i>Musculoskeletal</i></b>                                                   | 20 (2.5)   | 1 (1.1)   | 16 (2.5)  | 3 (4.2)   | 0.486 |
| Muscle atrophy or weakness                                                      | 4 (0.5)    | 1 (1.1)   | 3 (0.5)   | 0 (0.0)   | 0.590 |
| Deforming or erosive arthritis                                                  | 16 (2.0)   | 0 (0.0)   | 13 (2.0)  | 3 (4.2)   | 0.158 |
| <b><i>Skin</i></b>                                                              | 18 (2.3)   | 0 (0.0)   | 17 (2.7)  | 1 (1.4)   | 0.209 |
| Scarring chronic alopecia                                                       | 16 (2.0)   | 0 (0.0)   | 15 (2.4)  | 1 (1.4)   | 0.291 |
| Extensive scarring or panniculum other than scalp and pulp space                | 2 (0.3)    | 0 (0.0)   | 1 (0.2)   | 1 (1.4)   | 0.120 |
| Skin ulceration (excluding thrombosis) for >6 months                            | 2 (0.3)    | 0 (0.0)   | 2 (0.3)   | 0 (0.0)   | 1.000 |
| <b><i>Premature gonadal failure</i></b>                                         | 8 (1.0)    | 2 (2.3)   | 6 (0.9)   | 0 (0.0)   | 0.289 |
| <b><i>SDI<sup>d</sup> ≥1 on admission (%)</i></b>                               | 114 (14.3) | 12 (13.6) | 88 (13.8) | 14 (19.7) | 0.393 |

<sup>a</sup>JSLE, juvenile-onset SLE; <sup>b</sup>ASLE, adult-onset SLE; <sup>c</sup>LSLE, late-onset SLE;

<sup>d</sup>SDI, Systemic Lupus International Collaborating Clinics/American College of Rheumatology Damage Index.

Supplementary Table 2. Detailed cardiopulmonary involvement on admission among different age-onset groups

| <i>Cardiopulmonary involvement on admission</i> | All<br>(n=797) | JSLE <sup>a</sup><br>(n=88) | ASLE <sup>b</sup><br>(n=638) | LSLE <sup>c</sup><br>(n=71) | P     |
|-------------------------------------------------|----------------|-----------------------------|------------------------------|-----------------------------|-------|
| Myocarditis                                     | 13 (1.6)       | 1(1.1)                      | 12 (1.9)                     | 0(0)                        | 0.459 |
| Serositis                                       | 141(17.7)      | 8(9.1)                      | 119(18.7)                    | 14(19.7)                    | 0.079 |
| Interstitial lung disease                       | 36(4.5)        | 2(2.3)                      | 25(3.9)                      | 9(12.7)                     | 0.002 |
| Others                                          | 20(2.5)        | 1(1.1)                      | 17(2.7)                      | 2(2.8)                      | 0.681 |

<sup>a</sup>JSLE, juvenile-onset SLE; <sup>b</sup>ASLE, adult-onset SLE; <sup>c</sup>LSLE, late-onset SLE.
